# Supplementary material for: Mutagenesis and Identification of Sugarcane Mutants Using Survival on Polyethylene Glycol and Leaf Damage under Managed Water Stress
Source: Hindawi journal article supplement (doi:10.1155/2021/4387696), 2021-12-07
Supplement: f1 [file 4387696.f1.zip]

Archive with 3 entries (3 files):
- S table 1.docx
- supplementary fig 2.pptx
- Supplementary fig.1.pptx
