# Supplementary material for: Mutagenesis and Identification of Sugarcane Mutants Using Survival on Polyethylene Glycol and Leaf Damage under Managed Water Stress
Source: Hindawi journal article supplement (doi:10.1155/2021/4387696), 2021-12-07
Supplement: f1 [file 4387696.f1.zip › S table 1.docx]

Supplementary Table 1. Regeneration media of sugarcane calli for determining shoot regeneration, number of plantlets, and plantlet development.

| **Growth regulators** | | | **Shoot regeneration**  **(%)** | **Average weight of plantlets after  4 weeks incubation (g)** | **Average number of seedlings** | **Average height of seedlings after 1 month *ex vitro* transfer (cm)** |
| --- | --- | --- | --- | --- | --- | --- |
| **Coconut water (%)** | **NAA**  **(mg/l)** | **Kinetin**  **(mg/l)** |
| 10.00 | 0.00 | 0.00 | 48.75 b | 4.11 e | 22.07 b | 20.65 c |
| 10.00 | 0.25 | 0.25 | 63.75 ab | 4.22 e | 24.03 b | 22.64 bc |
| 10.00 | 0.25 | 0.50 | 80.00 a | 6.53 a | 34.81 a | 25.56 ab |
| 10.00 | 0.25 | 0.75 | 57.50 b | 5.43 bcd | 22.61 b | 25.24 ab |
| 10.00 | 0.25 | 1.00 | 66.25 ab | 5.67 bc | 17.74 c | 24.29 ab |
| 10.00 | 0.50 | 0.50 | 52.50 b | 4.69 de | 29.25 ab | 24.45 ab |
| 10.00 | 0.50 | 1.00 | 61.25 ab | 6.15 ab | 31.45 ab | 23.09 bc |
| 10.00 | 0.50 | 0.25 | 47.50 b | 5.08 cd | 21.91 b | 25.83 ab |
| 10.00 | 1.00 | 0.50 | 58.75 b | 5.55 c | 23.15 b | 27.10 a |
| F-test |  |  | ** | ** | * | * |

Means with different letters within a column indicate significant differences according to LSD. *, ** Significant at P <0.05, 0.01, respectively.
